# Supplementary material for: Evaluating the Contribution of Growth, Physiological, and Ionic Components Towards Salinity and Drought Stress Tolerance in Jatropha curcas
Source: PubMed Central journal article supplement (PMC7696781; doi:10.3390/plants9111574), 2020-11-13
Supplement: plants-09-01574-s001.pdf [file plants-09-01574-s001.pdf]

**Table 1** Adjustments made for IRGA to measure photosynthetic and transpiration rates, and stomatal conductance of all *Jatropha* plants

| <b>Sr.#</b> | <b>Specifications</b>                                        | <b>Values</b>                             |
|-------------|--------------------------------------------------------------|-------------------------------------------|
| 1.          | Leaf chamber temp.                                           | 34.6-39.5 °C                              |
| 2.          | ambient pressure                                             | 990 mBar                                  |
| 3.          | Ambient CO <sub>2</sub> concentration (C <sub>ref</sub> )    | 373 μmol mol <sup>-1</sup>                |
| 4.          | sub-stomatal CO <sub>2</sub> concentration (C <sub>i</sub> ) | 115-312 μmol mol <sup>-1</sup>            |
| 5.          | average water vapor pressure into chamber                    | 34.6 mBar                                 |
| 6.          | molar flow of air per unit leaf area (Us)                    | 206.6 mol m <sup>-2</sup> s <sup>-1</sup> |
| 7.          | PAR (Q leaf) at the leaf surface                             | 1200 μmol m <sup>-2</sup> s <sup>-1</sup> |
